# Supplementary material for: Macrophage depletion through colony stimulating factor 1 receptor pathway blockade overcomes adaptive resistance to anti-VEGF therapy
Source: PubMed Central journal article supplement (PMC5722500; doi:10.18632/oncotarget.20410), 2017-08-24
Supplement: oncotarget-08-96496-s001.pdf [file oncotarget-08-96496-s001.pdf]

# Macrophage depletion through colony stimulating factor 1 receptor pathway blockade overcomes adaptive resistance to anti-VEGF therapy

## SUPPLEMENTARY MATERIALS

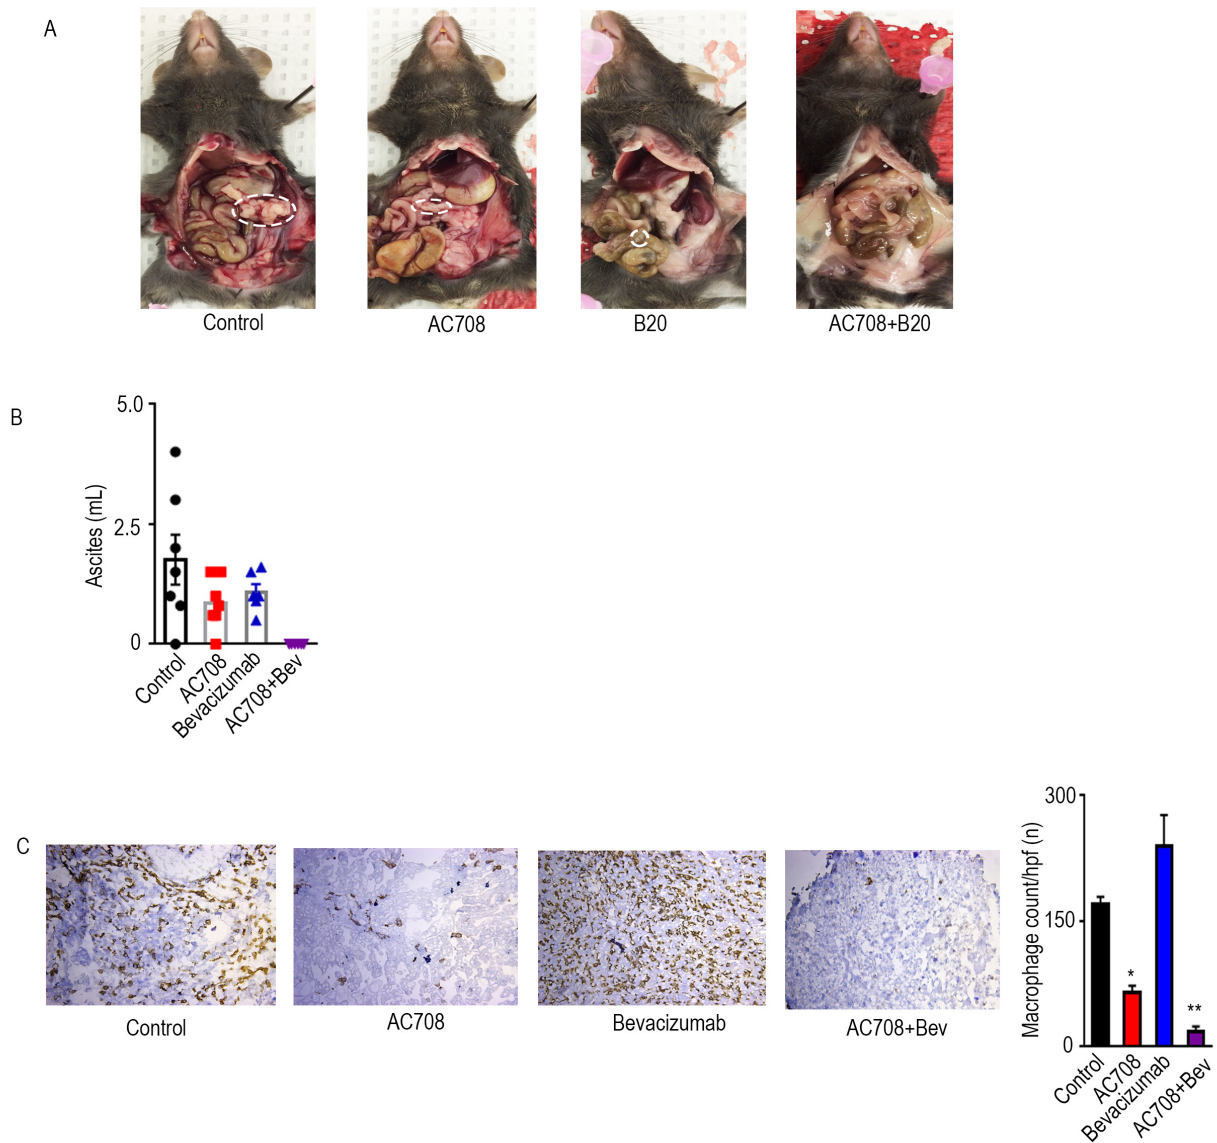

**Supplementary Figure 1. AC708 in combination with B20 has anti-tumor effects.** At time of dissection, representative pictures of mice from each group (no treatment, AC708, B20, combination) were taken **A**. Volume of ascites from PDX model is shown in **B**. Macrophage count by F4/80 antibody on immunohistochemistry was compared between groups for the PDX model **C**. The graph represents mean number of macrophages from 5 randomly selected high power fields at 20x high power. \* denotes  $p \leq 0.05$  and \*\* denotes  $p \leq 0.01$ .

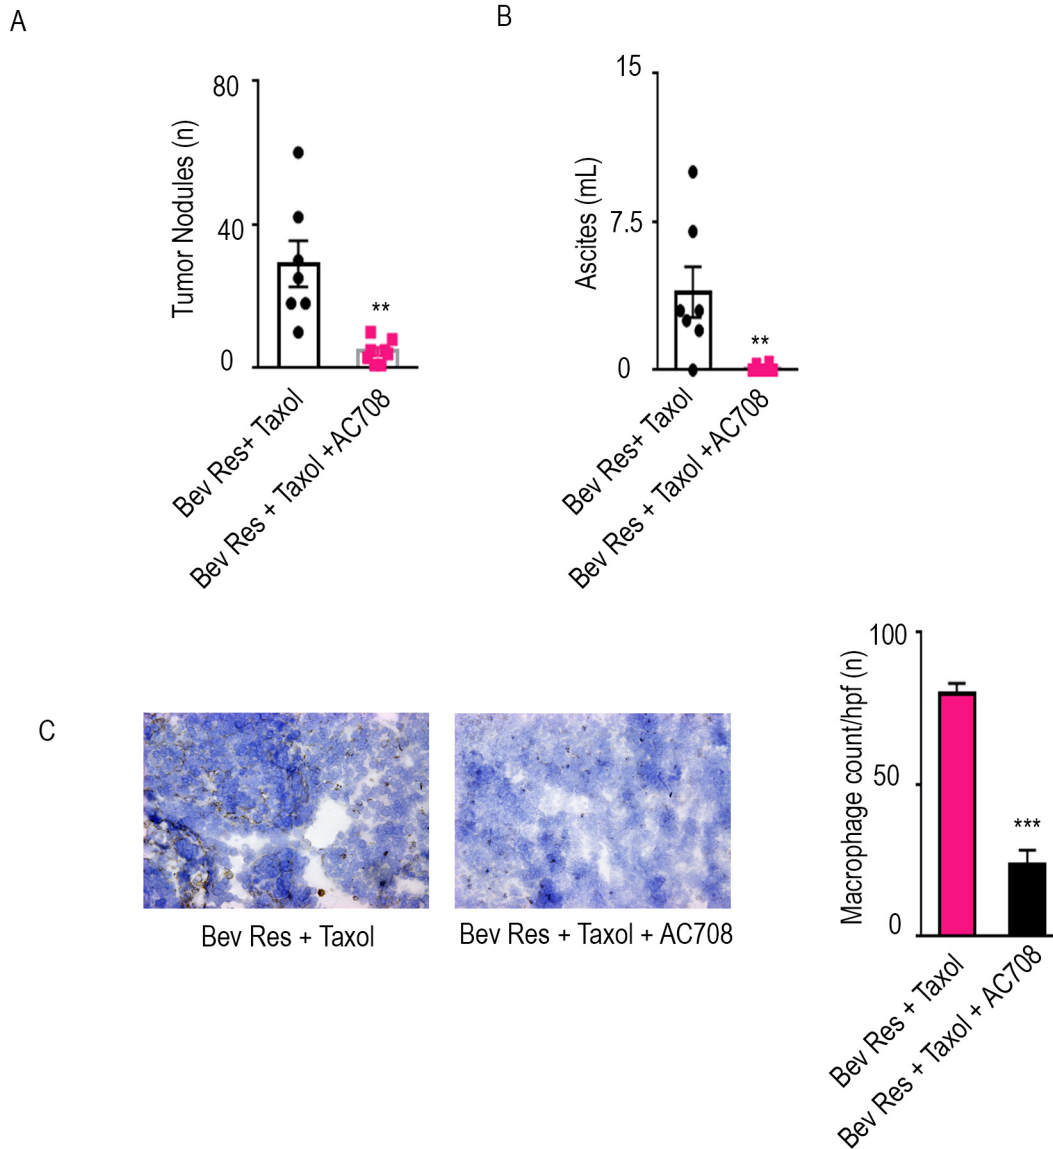

**Supplementary Figure 2. AC708 has anti-tumor effects when combined with bevacizumab in the setting of adaptive resistance.** A.-B. Number of tumor nodules and volume of ascites seen in OVCAR432 ovarian cancer model treated with bevacizumab, paclitaxel, and AC708 in the setting of adaptive resistance to bevacizumab. The corresponding tumors were stained with F4/80 antibody using immunohistochemistry and macrophages were quantified and are represented in the bar graph C. \*\* denotes  $p \leq 0.01$  and \*\*\* denotes  $p \leq 0.001$ .

**Supplementary Table 1: Markers for CyTOF Analysis.**

| No. | Isotope | Mass Channel | Myeloid panel  |   | Surface / Intracellular | T-cell panel       | Surface / Intracellular |
|-----|---------|--------------|----------------|---|-------------------------|--------------------|-------------------------|
| 1   | 139La   | 139          | OX40L          | S |                         |                    |                         |
| 2   | 141Pr   | 141          | FAK            | I |                         | Bcl-xL             | I                       |
| 3   | 142Nd   | 142          | CD11c          | S |                         | clv-Caspase 3      | I                       |
| 4   | 143Nd   | 143          |                |   |                         |                    |                         |
| 5   | 144Nd   | 144          | p-AKT          | S |                         | IL-2               | I                       |
| 6   | 145Nd   | 145          | CD80           | S |                         |                    |                         |
| 7   | 146Nd   | 146          |                |   |                         | BIM                | I                       |
| 8   | 147Sm   | 147          | CD45           | S |                         | CD45               | S                       |
| 9   | 148Nd   | 148          | CD11b          | S |                         | Ki-67              | I                       |
| 10  | 149Sm   | 149          | CD19           | S |                         |                    |                         |
| 11  | 150Nd   | 150          | CD25           | S |                         | CD25               | S                       |
| 12  | 151Eu   | 151          |                |   |                         | CD28               | S                       |
| 13  | 152Sm   | 152          | CD40           | S |                         | Bcl-6              | I                       |
| 14  | 153Eu   | 153          |                |   |                         | OX-40              | S                       |
| 15  | 154Sm   | 154          | GM-CSF         | I |                         | 4-1BB              | S                       |
| 16  | 155Gd   | 155          |                |   |                         | ICOS               | S                       |
| 17  | 156Gd   | 156          | CD34           | S |                         | CD69               | S                       |
| 18  | 158Gd   | 158          |                |   |                         | Foxp3              | I                       |
| 19  | 159Tb   | 159          | F4/80          | S |                         |                    |                         |
| 20  | 160Gd   | 160          | PD-L2          | S |                         | p-PI3K             | I                       |
| 21  | 161Dy   | 161          | IL-12          | I |                         | PD-1               | S                       |
| 22  | 162Dy   | 162          | TNF $\alpha$   | I |                         | TNF $\alpha$       | I                       |
| 23  | 163Dy   | 163          |                |   |                         | CTLA-4             | S                       |
| 24  | 164Dy   | 164          | PD-L1          | S |                         | TCR $\gamma\delta$ | S                       |
| 25  | 165Ho   | 165          | HIF-1 $\alpha$ | I |                         | IFN $\gamma$       | I                       |
| 26  | 166Er   | 166          | CD206          | S |                         | Tim 3              | S                       |
| 27  | 167Er   | 167          | IL-6           | I |                         |                    |                         |
| 28  | 168Er   | 168          | CD8a           | S |                         | CD8a               | S                       |
| 29  | 169Tm   | 169          |                |   |                         |                    | S                       |
| 30  | 170Er   | 170          | NK1.1          | S |                         | CD27               | S                       |
| 31  | 171Yb   | 171          |                |   |                         | CD44               | S                       |
| 32  | 172Yb   | 172          | CD4            | S |                         | CD4                | S                       |
| 33  | 173Yb   | 173          | Ly6G           | S |                         | LAG-3              | S                       |
| 34  | 174Yb   | 174          | MHC Class II   | S |                         | IL17A              | I                       |
| 35  | 175Lu   | 175          | Ly6C           | S |                         |                    |                         |
| 36  | 176Yb   | 176          | B220           | S |                         |                    |                         |

Immune profiling was performed via CyTOF using a panel of T-cell and myeloid surface and intracellular markers. The isotope and mass channel for each marker is listed in the table. All markers are either listed as S for surface marker, or I for intracellular marker.
